# Supplementary material
Source: MDPI journal article supplement (https://www.mdpi.com/2073-4433/13/12/2031)
Supplement: s1 [file s1]

Archive with 2 entries (2 files):
- atmosphere-2004136-Supplementary Materials-Part I.pdf
- Supplementary Materials-Part II.pdf
