# Supplementary material
Source: MDPI journal article supplement (https://www.mdpi.com/2073-4433/13/12/2031)
Supplement: s1 [file s1 › atmosphere-2004136-Supplementary Materials-Part I.pdf]

# Supplementary Materials (Part I):

Walid Ahmed, Lydia Marini Hoffmann, Talib Al-Hasani and Rafael M. Santos

**Table S1.** DTR data points in each year.

| Year. | Days in this year | Total Stations | Total data points | Available data points | Excluded data points |
|-------|-------------------|----------------|-------------------|-----------------------|----------------------|
| 2020  | 366               | 189            | 69174             | 67097                 | 2077                 |
| 2019  | 365               | 189            | 68985             | 67943                 | 1042                 |
| 2018  | 365               | 189            | 68985             | 67730                 | 1255                 |
| 2017  | 365               | 189            | 68985             | 67548                 | 1437                 |
| 2016  | 366               | 189            | 69174             | 68436                 | 738                  |
| 2015  | 365               | 189            | 68985             | 68068                 | 917                  |

## Approaches for ordering data (both retrieve the same data sets)

### First approach:

1. Search for NOAA climate data online and click on the website 'ncdc.noaa.gov/cdo-web/' (accessed on 20 November 2022)
2. Click on 'Mapping Tools' and select 'Daily summary observations'
3. Click on the symbol of the wrench which denotes 'Map tools'. A window named 'DAILY OBSERVATION TOOLS' will pop up.
4. Click on 'Location' and select 'US State' in the option.
5. Select the preferred state and click on 'Zoom to location'
6. The stations will show up in the left-hand side of the window. Now click on the option, 'View Station Details', under the desired station.
7. Click on the option that says 'Add to Cart'
8. Click on the option, 'Cart (Free Data)', that is on the upper right side of the window.
9. Select 'Custom GHCN-Daily CSV'
10. Put the date range and press on 'CONTINUE'.
11. Select 'Metric' in the option 'Units'.
12. Expand the option 'Air Temperature' by clicking on the sign '+' that is on the left-hand side of the option. And click on the boxes of 'Maximum temperature (TMAX)' and 'Minimum temperature (TMIN)'. Click on 'CONTINUE'.
13. Put desired email address on the respective boxes and click on 'SUBMIT ORDER'. The file will be sent in the email address within a while. The ordered file will be sent in the second email. It can be downloaded from there.

This approach was not working properly because sometimes the stations were not showing up and sometimes there were few stations that were showing up. Also, in this approach only one station can be ordered at a single time. So mostly, the following approach (2<sup>nd</sup> approach) was used for ordering the data.

### Second approach:

1. Search for NOAA climate data online and click on the website 'ncdc.noaa.gov/cdo-web/' (accessed on 20 November 2022)
2. Click on 'Data Tools'. In the following window click on 'Select a Location'
3. Underneath the option 'Select a Dataset', select the option 'Daily Summaries'.
4. Underneath the option 'Select a Location Type', select the option 'State'.
5. The states of United States will show up after that. Then click on the preferred state and the stations of this state will show up below.
6. The necessary stations are looked for in the screen and they are selected by clicking on the option 'Add to Cart' that lies on the right-hand side of each stations.

8. Click on the option, 'Cart (Free Data)', that is on the upper right side of the window. The rest of the process is exactly same starting from point 9 of the first approach.

### Station-wise yearly average DTR for the years 2015-2020

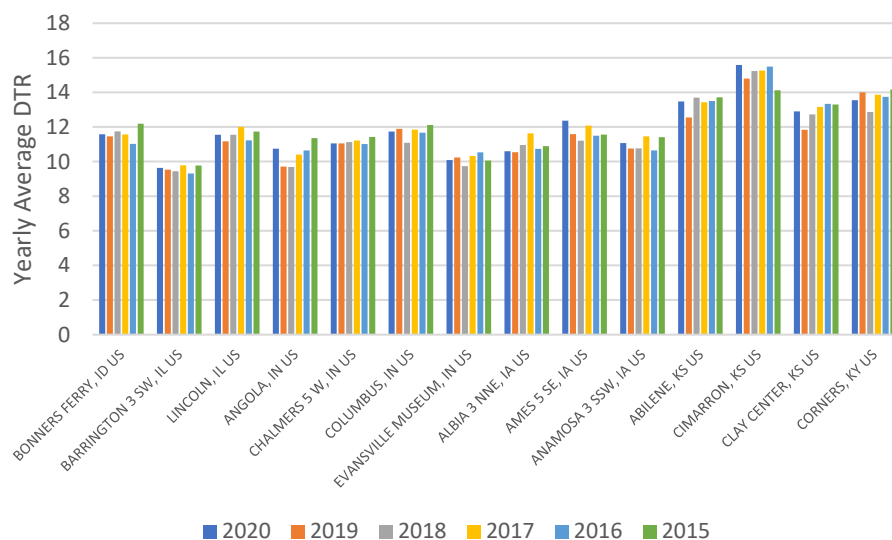

**Figure S1.** Station-wise yearly average DTR for the years 2015-2020.

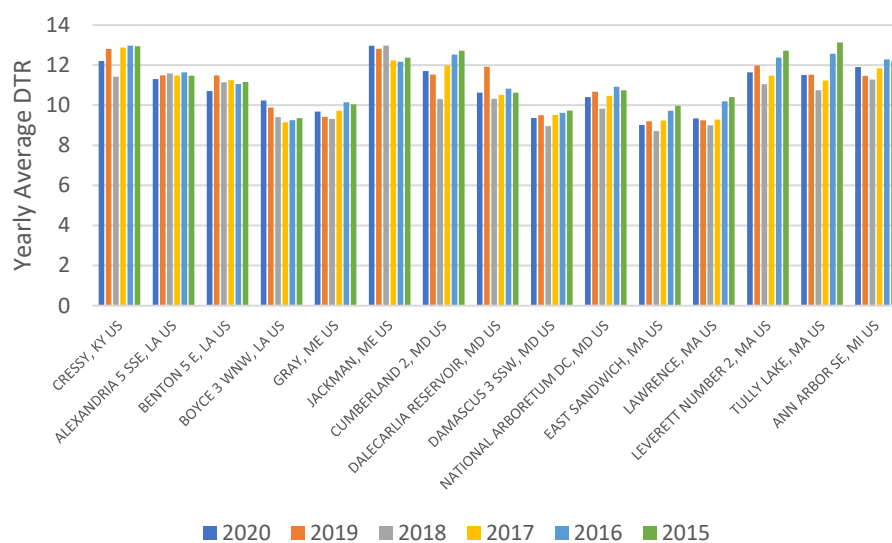

**Figure S2.** Station-wise yearly average DTR for the years 2015-2020.

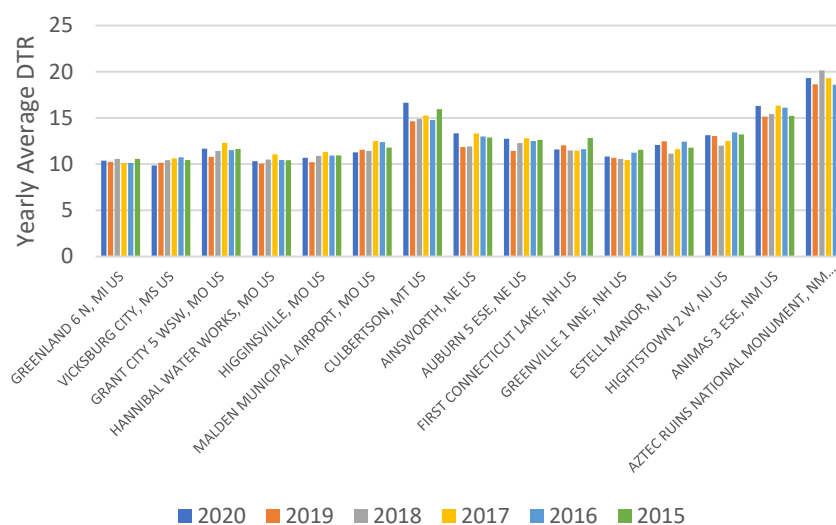

**Figure S3.** Station-wise yearly average DTR for the years 2015-2020.

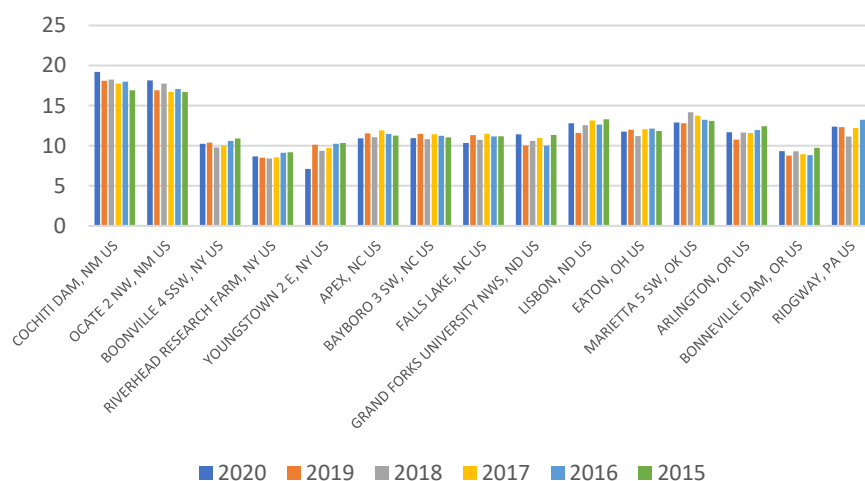

**Figure S4.** Station-wise yearly average DTR for the years 2015-2020.

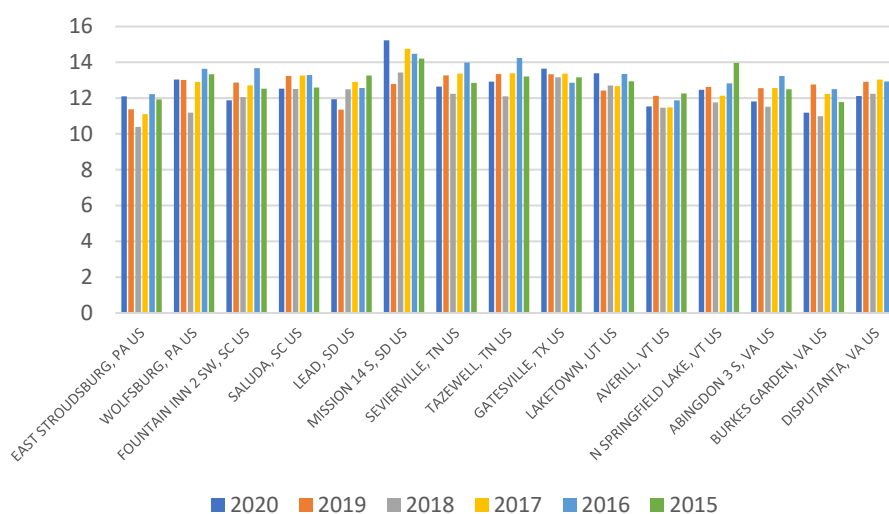

**Figure S5.** Station-wise yearly average DTR for the years 2015-2020.

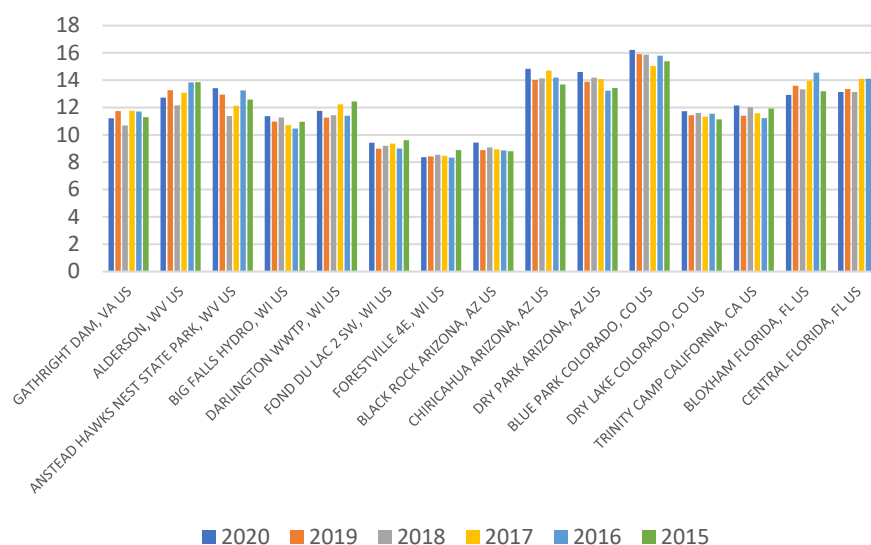

**Figure S6.** Station-wise yearly average DTR for the years 2015-2020.

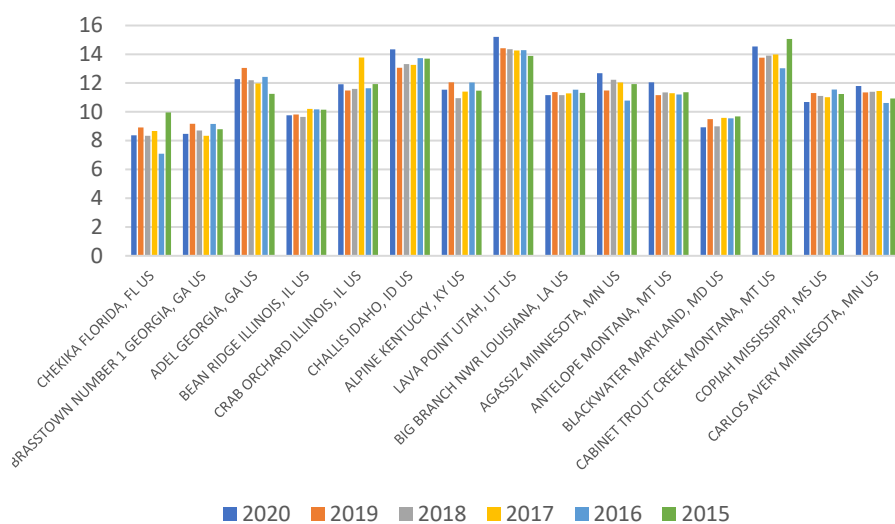

**Figure S7.** Station-wise yearly average DTR for the years 2015-2020.

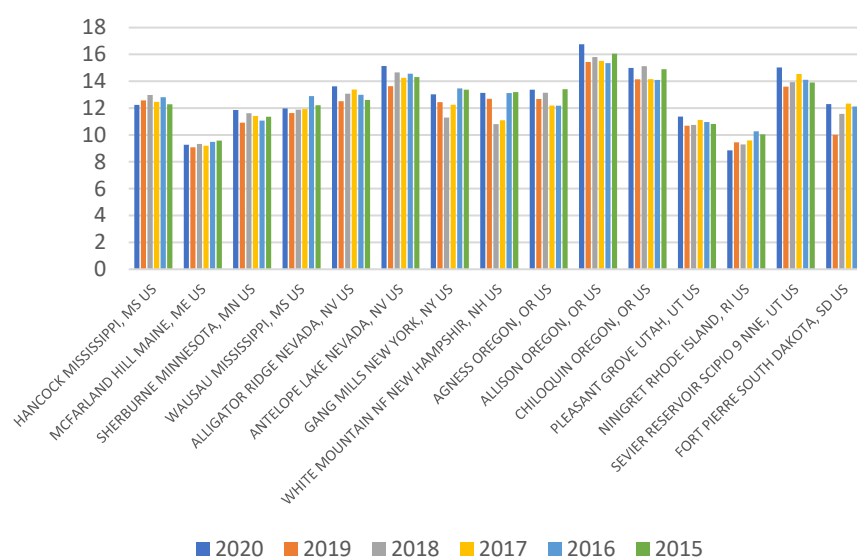

**Figure S8.** Station-wise yearly average DTR for the years 2015-2020.

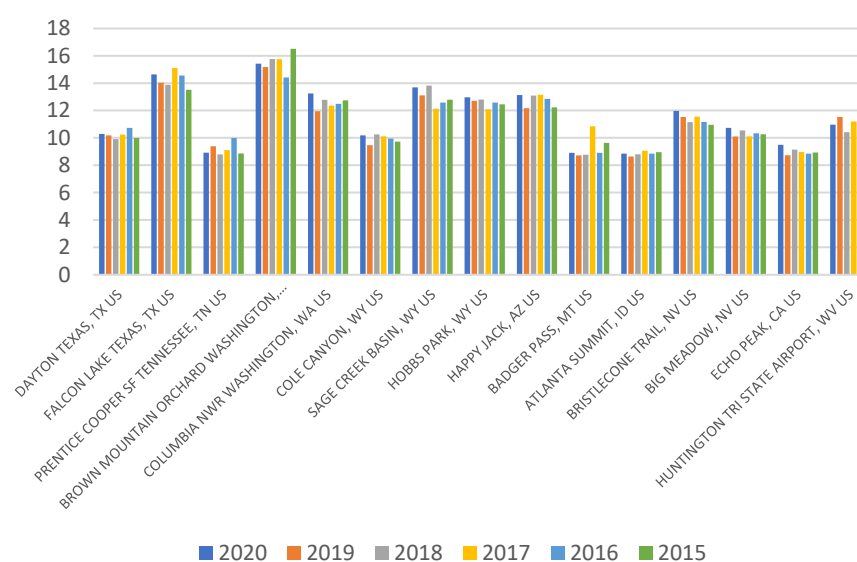

**Figure S9.** Station-wise yearly average DTR for the years 2015-2020.

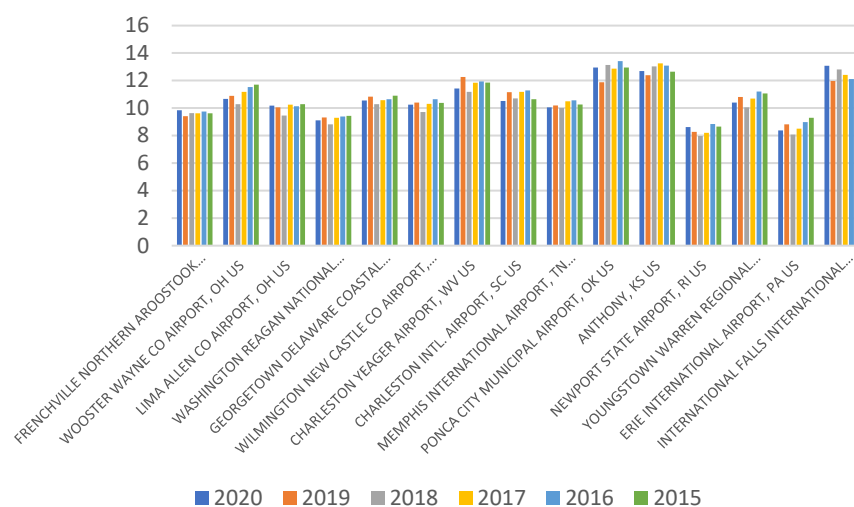

**Figure S10.** Station-wise yearly average DTR for the years 2015-2020.

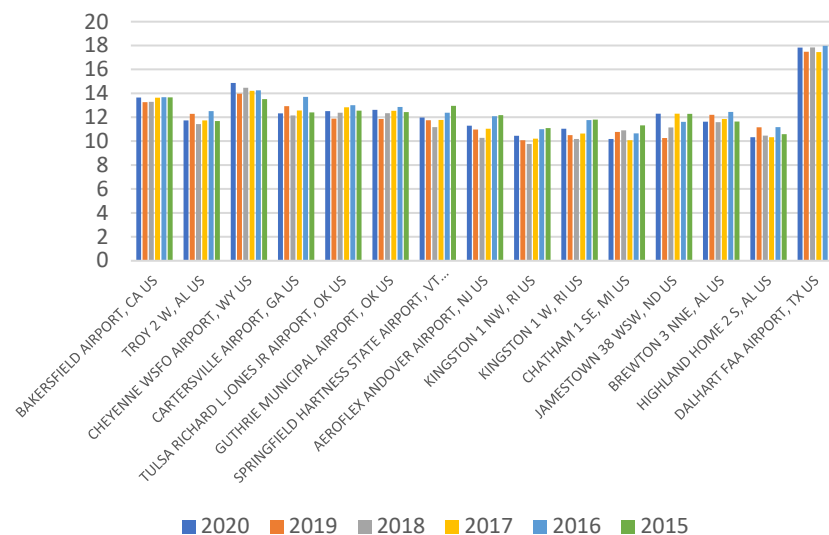

**Figure S11.** Station-wise yearly average DTR for the years 2015-2020.

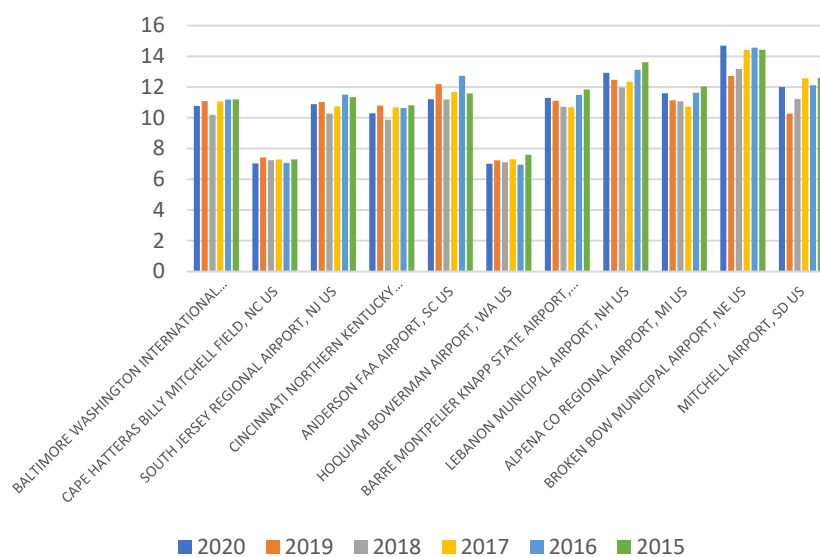

**Figure S12.** Station-wise yearly average DTR for the years 2015-2020.
