# Supplementary material
Source: MDPI journal article supplement (https://www.mdpi.com/2073-4433/13/12/2031)
Supplement: s1 [file s1 › Supplementary Materials-Part II.pdf]

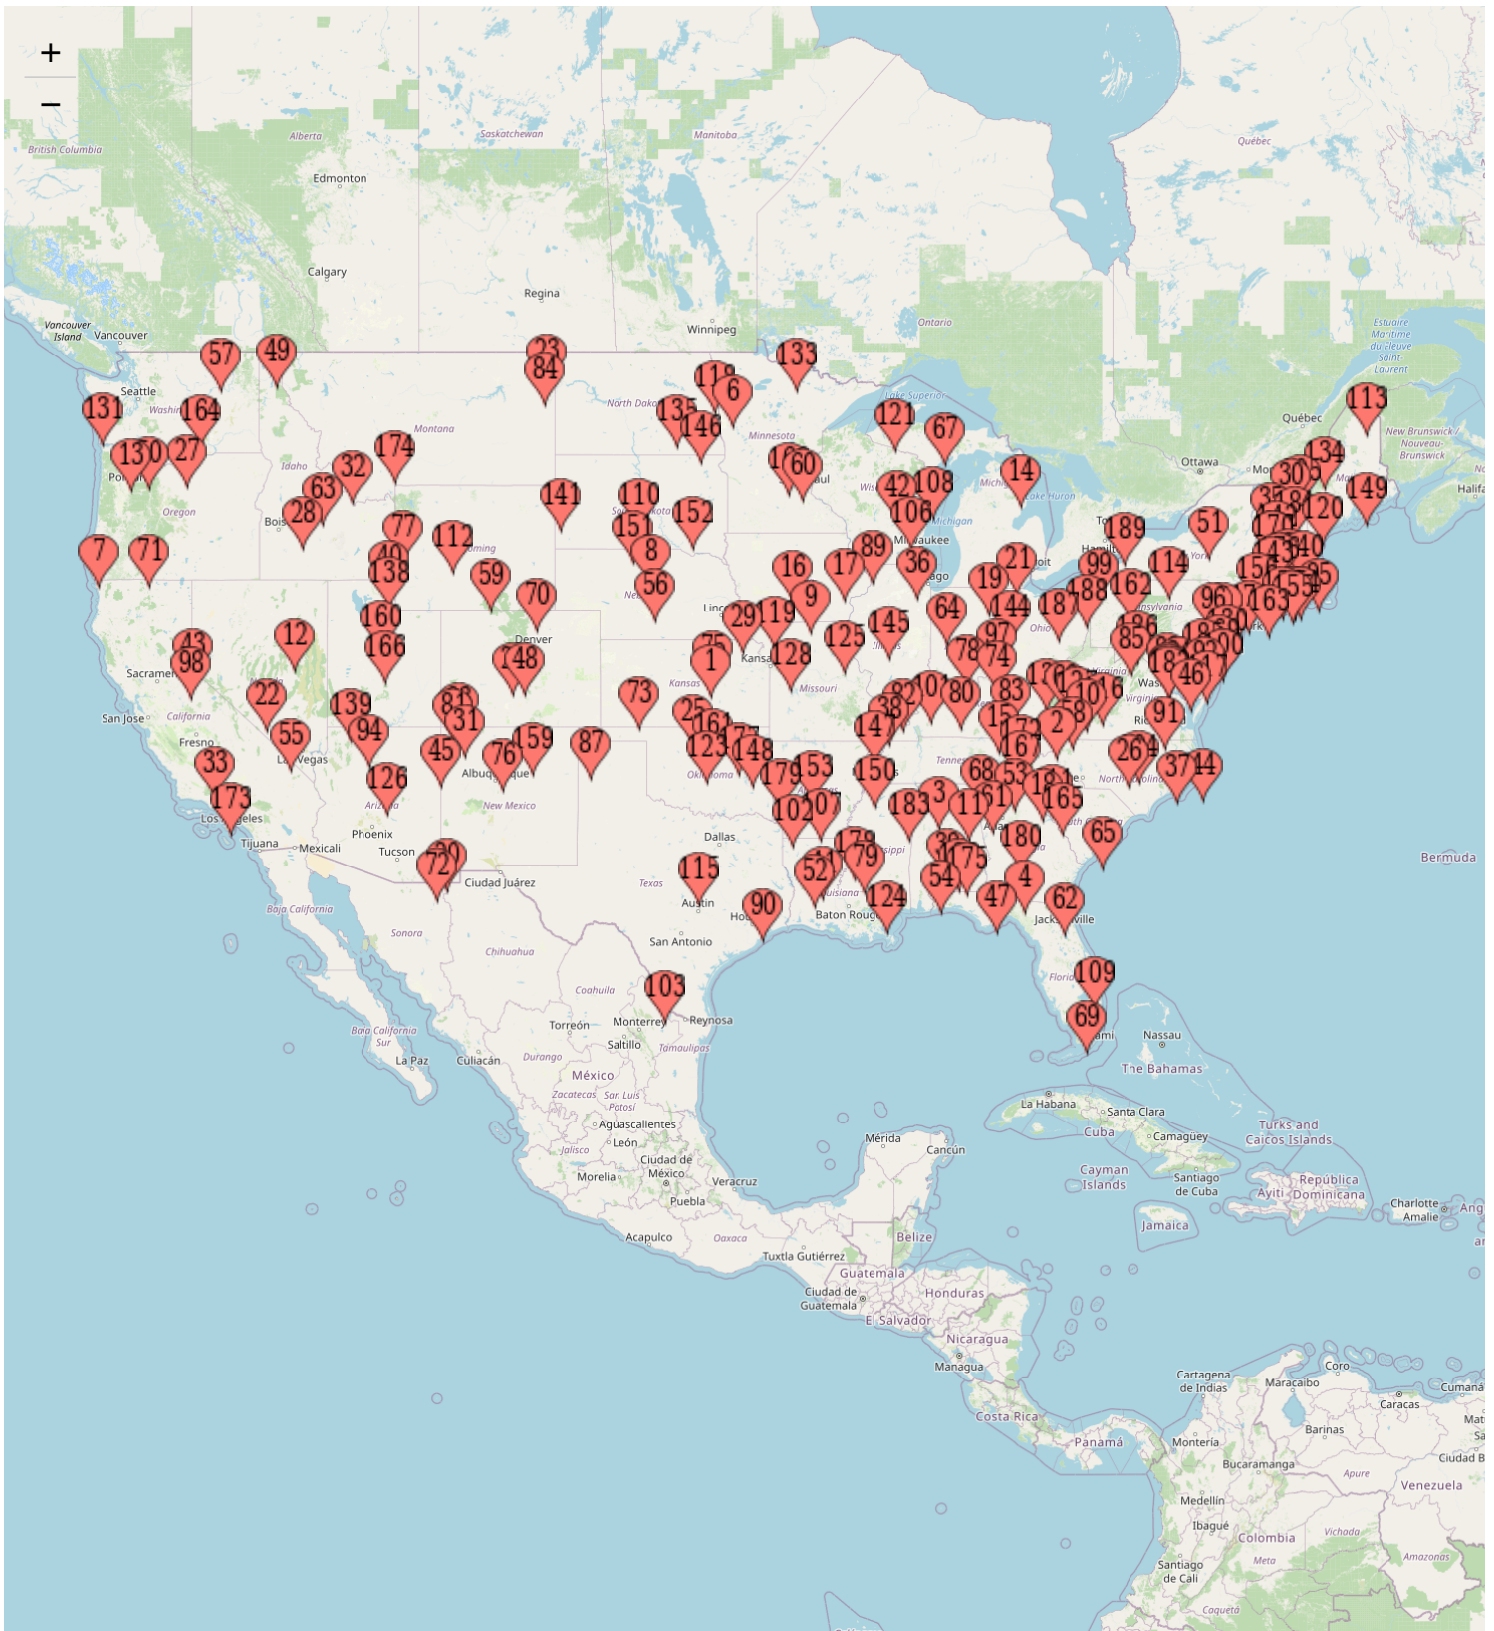

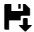 Save

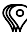 Bulk Entry

Location

Address to plot

Description

(Optional) enter a description for this location

Add location to map

|                                                                                                             |                                                                                                                            |                                                                                                                                                                                       |
|-------------------------------------------------------------------------------------------------------------|----------------------------------------------------------------------------------------------------------------------------|---------------------------------------------------------------------------------------------------------------------------------------------------------------------------------------|
| <div><div>1</div>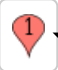</div>    | Abilene, Dickinson County, Kansas, United States                                                                           | <div>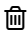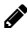</div>     |
| <div><div>2</div>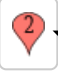</div>    | <div>Abingdon, Washington County, Virginia, United States</div> <div>▼</div>                                               | <div>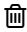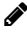</div>     |
| <div><div>3</div>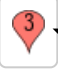</div>   | Addison, Winston County, Alabama, United States                                                                            | <div>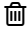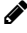</div>    |
| <div><div>4</div>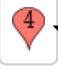</div>  | Adel, Cook County, Georgia, 31620, United States                                                                           | <div>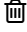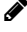</div> |
| <div><div>5</div>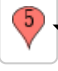</div>  | Aeroflex-Andover Airport, Lake Aeroflex Road, Wawayanda, Andover Township, Sussex County, New Jersey, 07860, United States | <div>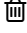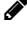</div> |
| <div><div>6</div>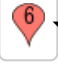</div>  | <div>Agassiz Recreational Trail, Fertile, Polk County, Minnesota, 56540, United States</div> <div>▼</div>                  | <div>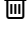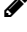</div> |
| <div><div>7</div>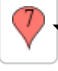</div>  | Agness, Curry County, Oregon, 97406, United States                                                                         | <div>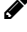</div> |
| <div><div>8</div>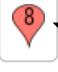</div>  | Ainsworth, Brown County, Nebraska, United States                                                                           | <div>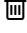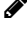</div> |
| <div><div>9</div>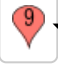</div>  | Albia, Monroe County, Iowa, 52531, United States                                                                           | <div>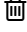</div> |
| <div><div>10</div>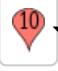</div> | <div>Alderson, Greenbrier County, West Virginia, 24910, United States</div> <div>▼</div>                                   | <div>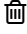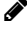</div> |
| <div><div>11</div>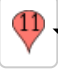</div> | <div>Alexandria, Calhoun County, Alabama, 36250, United States</div> <div>▼</div>                                          | <div></div> |

|                                                                                     |                                                                                                                                        |                                                                                                                                                                                |
|-------------------------------------------------------------------------------------|----------------------------------------------------------------------------------------------------------------------------------------|--------------------------------------------------------------------------------------------------------------------------------------------------------------------------------|
| 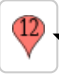    | Alligator Ridge Gold Mine, White Pine County, Nevada, United States                                                                    | 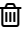<br>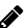     |
| 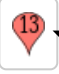   | U.S. Transmission & Truck Repair, 10, Northeast Walker Street, East Columbia, Portland, Multnomah County, Oregon, 97211, United States | 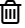<br>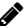     |
| 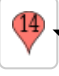   | Alpena County Regional Airport, 3rd Avenue, Maple Ridge Township, Alpena County, Michiga <span>▼</span>                                | 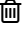<br>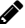     |
| 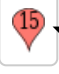   | Alpine, Pulaski County, Kentucky, 42519, United States                                                                                 | 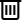<br>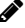     |
| 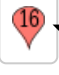   | Ames, Story County, Iowa, United States                                                                                                | 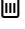<br>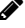     |
| 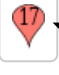   | Anamosa, Jones County, Iowa, United States                                                                                             | 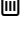<br>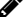     |
| 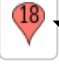   | Anderson County, South Carolina, United States <span>▼</span>                                                                          | 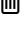<br>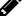     |
| 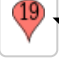   | Angola, Steuben County, Indiana, United States                                                                                         | 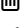<br>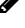     |
| 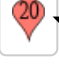 | Animas, Hidalgo County, New Mexico, 88020, United States                                                                               | 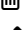<br>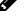 |
| 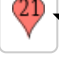 | Ann Arbor, Washtenaw County, Michigan, United States <span>▼</span>                                                                    | 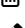<br>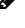 |
| 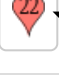 | Antelope Target, Browne's Lake Road, Nye County, Nevada, United States                                                                 | 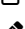<br>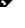 |
| 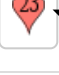 | Antelope, Sheridan County, Montana, United States <span>▼</span>                                                                       | 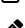<br>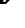 |
| 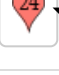 | Antero Reservoir, Park County, Colorado, United States                                                                                 | 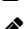<br>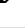 |
| 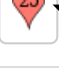 | Anthony, Harper County, Kansas, 67003, United States <span>▼</span>                                                                    | 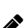<br>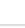 |
| 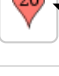 | Apex, Wake County, North Carolina, 27502, United States                                                                                | 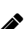<br>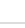 |
| 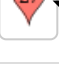 | Arlington, Gilliam County, Oregon, United States                                                                                       | 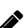<br>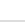 |
| 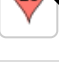 | Atlanta, Elmore County, Idaho, 83601, United States                                                                                    | 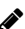<br>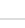 |

|                                                                                     |                                                                                                                                     |                                                                                                                                                                                |
|-------------------------------------------------------------------------------------|-------------------------------------------------------------------------------------------------------------------------------------|--------------------------------------------------------------------------------------------------------------------------------------------------------------------------------|
| 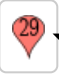    | Auburn, Nemaha County, Nebraska, 68305, United States                                                                               | 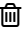<br>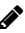     |
| 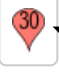   | <div>Averill, Essex County, Vermont, 05901, United States</div>                                                                     | 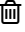<br>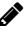     |
| 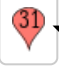   | Aztec Ruins National Monument, Aztec, San Juan County, New Mexico, United States                                                    | 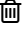<br>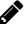     |
| 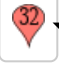   | Badger Pass, Beaverhead County, Montana, United States                                                                              | 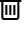<br>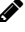     |
| 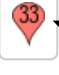   | <div>Bakersfield Municipal Airport, Coy Avenue, Bakersfield, Kern County, California, 93304, United States</div>                    | 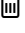<br>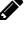     |
| 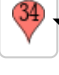   | Baltimore-Washington International/Thurgood Marshall Airport, 7050, Ridge Road, Anne Arundel County, Maryland, 21240, United States | 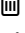<br>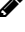     |
| 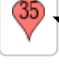   | Edward F Knapp State Airport, East Road, Berlin, Washington County, Vermont, 05641, United States                                   | 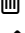<br>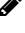     |
| 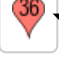   | <div>Barrington, Barrington Township, Cook County, Illinois, 60010, United States</div>                                             | 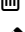<br>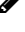     |
| 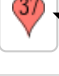 | Bayboro, Pamlico County, North Carolina, United States                                                                              | 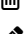<br>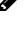 |
| 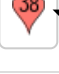 | Bean Ridge Road, Thebes, Alexander County, Illinois, 62990, United States                                                           | 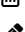<br>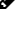 |
| 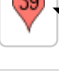 | <div>Benton, Lowndes County, Alabama, United States</div>                                                                           | 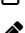<br>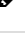 |
| 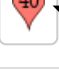 | Bern, Bear Lake County, Idaho, 83220, United States                                                                                 | 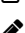<br>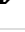 |
| 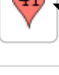 | <div>Big Branch, La Salle Parish, Louisiana, United States</div>                                                                    | 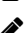<br>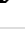 |
| 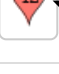 | <div>Big Falls, Waupaca County, Wisconsin, 54926, United States</div>                                                               | 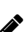<br>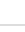 |
| 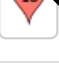 | Big Meadow, Washoe County, Nevada, United States                                                                                    | 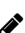<br>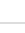 |
| 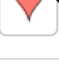 | <div>Billy Mitchell Airstrip, North Carolina Highway 12, Frisco, Dare County, North Carolina, 27936, United States</div>            | 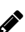<br>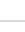 |
| 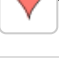 | <div>Black Rock, Fort Defiance, Fort Defiance Agency, Apache County, Arizona, 86504, United States</div>                            | 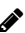<br>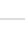 |

|                                                                                     |                                                                                                       |                                                                                                                                                                                |
|-------------------------------------------------------------------------------------|-------------------------------------------------------------------------------------------------------|--------------------------------------------------------------------------------------------------------------------------------------------------------------------------------|
| 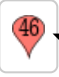    | Blackwater, Dorchester County, Maryland, 21622, United States                                         | <br>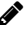     |
| 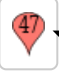   | Bloxham, Leon County, Florida, United States                                                          | <br>     |
| 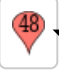   | Blue Mountain, Park County, Colorado, United States                                                   | <br>     |
| 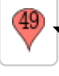   | Bonnars Ferry, Boundary County, Idaho, 83503, United States                                           | <br>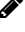     |
| 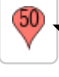   | Bonneville Dam, North Bonneville, Multnomah County, Oregon, United States                             | <br>     |
| 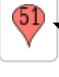   | Town of Boonville, Oneida County, New York, 13309, United States                                      | <br>     |
| 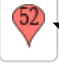   | Boyce, Rapides Parish, Louisiana, United States                                                       | <br>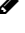     |
| 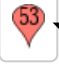   | Brasstown Bald, Towns County, Georgia, United States                                                  | 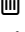<br>     |
| 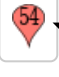 | Brewton, Escambia County, Alabama, United States                                                      | <br>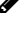 |
| 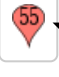 | Lower Bristlecone Trail, Lee Canyon, Clark County, Nevada, United States                              | <br> |
| 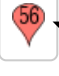 | Broken Bow Municipal Airport, Airport Road, Broken Bow, Custer County, Nebraska, 68822, United States | <br> |
| 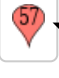 | Brown Mountain, Ferry County, Washington, United States                                               | <br> |
| 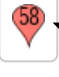 | Burkes Garden, Tazewell County, Virginia, 24608, United States                                        | <br> |
| 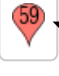 | Carbon County, Wyoming, United States                                                                 | 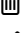<br> |
| 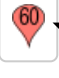 | Carlos Avery State Wildlife Management Area, Columbus, Anoka County, Minnesota, United States         | <br>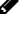 |
| 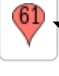 | Cartersville Airport, Old Alabama Road, Bartow County, Georgia, 30129, United States                  | <br> |
| 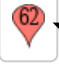 | Central, West Bay Street, LaVilla, Jacksonville, Duval County, Florida, 32202, United States          | <br> |

|                                                                                     |                                                                                                        |                                                                                                                                                                                |
|-------------------------------------------------------------------------------------|--------------------------------------------------------------------------------------------------------|--------------------------------------------------------------------------------------------------------------------------------------------------------------------------------|
| 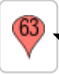    | Challis, Custer County, Idaho, United States                                                           | <br>     |
| 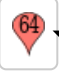   | Chalmers, White County, Indiana, United States                                                         | <br>     |
| 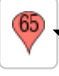   | <div>Charleston, Charleston County, South Carolina, United States</div>                                | <br>     |
| 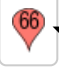   | <div>Charleston, Kanawha County, West Virginia, United States</div>                                    | <br>     |
| 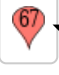   | <div>Chatham, Rock River Township, Alger County, Michigan, United States</div>                         | <br>     |
| 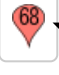   | <div>Chattanooga, Hamilton County, Tennessee, United States</div>                                      | <br>     |
| 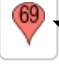   | Chekika Island, Miami-Dade County, Florida, United States                                              | <br>     |
| 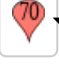   | <div>Cheyenne, Laramie County, Wyoming, United States</div>                                            | <br>     |
| 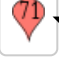 | Chiloquin, Klamath County, Oregon, United States                                                       | <br> |
| 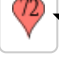 | Chiricahua, Cochise County, Arizona, United States                                                     | <br> |
| 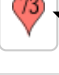 | <div>Cimarron, Gray County, Kansas, United States</div>                                                | <br> |
| 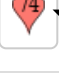 | <div>Cincinnati/Northern Kentucky International Airport, Petersburg Road, Boone County, Kentucky</div> | <br> |
| 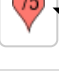 | <div>Clay Center, Clay County, Kansas, United States</div>                                             | <br> |
| 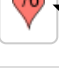 | Cochiti Dam, Sandoval County, New Mexico, United States                                                | <br> |
| 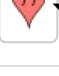 | Cole Canyon Road, Teton County, Wyoming, United States                                                 | <br> |
| 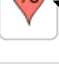 | Columbus, Bartholomew County, Indiana, 47201, United States                                            | <br> |
| 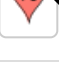 | Copiah County, Mississippi, United States                                                              | <br> |

|                                                                                     |                                                                                          |   |                                                                                                                                                                                |
|-------------------------------------------------------------------------------------|------------------------------------------------------------------------------------------|---|--------------------------------------------------------------------------------------------------------------------------------------------------------------------------------|
| 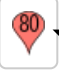   | Corners, Breckinridge County, Kentucky, United States                                    | ▼ | <br>     |
| 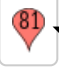   | Cortez, Montezuma County, Colorado, 81321, United States                                 | ▼ | <br>     |
| 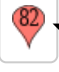   | Crab Orchard, Williamson County, Illinois, United States                                 | ▼ | 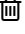<br>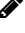     |
| 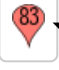   | Cressy, Estill County, Kentucky, United States                                           |   | <br>     |
| 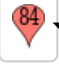   | Culbertson, Roosevelt County, Montana, United States                                     |   | 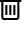<br>     |
| 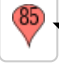   | Cumberland, Allegany County, Maryland, 21502, United States                              | ▼ | <br>     |
| 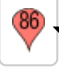   | Dalecarlia Reservoir, Washington, Montgomery County, District of Columbia, United States |   | <br>     |
| 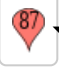   | Dalhart, Dallam County, Texas, 79022, United States                                      | ▼ | 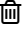<br>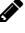     |
| 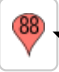 | Damascus, Montgomery County, Maryland, 20872, United States                              | ▼ | 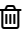<br>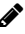 |
| 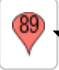 | Darlington, Lafayette County, Wisconsin, 53530, United States                            |   | 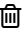<br> |
| 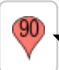 | Dayton, Liberty County, Texas, 77535, United States                                      | ▼ | 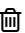<br>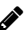 |
| 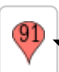 | Disputanta, Prince George County, Virginia, 23842, United States                         | ▼ | 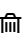<br>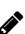 |
| 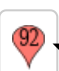 | Dover, Kent County, Delaware, United States                                              | ▼ | 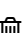<br>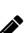 |
| 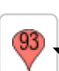 | Dry Lake, Montezuma County, Colorado, United States                                      | ▼ | 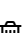<br>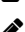 |
| 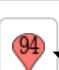 | Dry Park, Coconino County, Arizona, United States                                        |   | 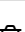<br> |
| 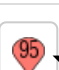 | East Sandwich, Sandwich, Barnstable County, Massachusetts, 02537, United States          | ▼ | 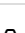<br>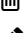 |
| 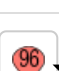 | East Stroudsburg, Monroe County, Pennsylvania, 18301, United States                      |   | 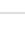<br>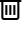 |

|                                                                                     |                                                                                                                                         |   |                                                                                                                                                                                |
|-------------------------------------------------------------------------------------|-----------------------------------------------------------------------------------------------------------------------------------------|---|--------------------------------------------------------------------------------------------------------------------------------------------------------------------------------|
| 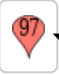    | Eaton, Preble County, Ohio, United States                                                                                               | ▼ | <br>     |
| 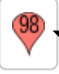   | Echo Peak, El Dorado County, California, 96155, United States                                                                           |   | <br>     |
| 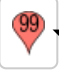   | Erie International Airport, 4411, West 12th Street, Sunset Gardens, Millcreek Township, Erie County, Pennsylvania, 16505, United States |   | <br>     |
| 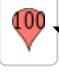   | Estell Manor, Atlantic County, New Jersey, 08319, United States                                                                         | ▼ | <br>     |
| 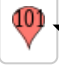   | Evansville Museum, Pigeon Creek Greenway, Evansville, Vanderburgh County, Indiana, 47708, United States                                 |   | <br>     |
| 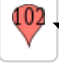   | Evening Shade, Hempstead County, Arkansas, United States                                                                                | ▼ | <br>     |
| 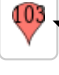   | Falcon Lake, Zapata County, Texas, United States                                                                                        |   | <br>     |
| 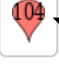   | Falls Lake, Wake County, North Carolina, United States                                                                                  | ▼ | <br>     |
| 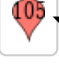 | First Connecticut Lake, Pittsburg, Coos County, New Hampshire, United States                                                            | ▼ | <br> |
| 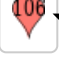 | Fond du Lac County, Wisconsin, United States                                                                                            | ▼ | <br> |
| 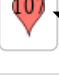 | Fordyce, Dallas County, Arkansas, 71742, United States                                                                                  | ▼ | <br> |
| 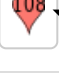 | Forestville, Door County, Wisconsin, United States                                                                                      |   | <br> |
| 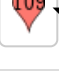 | Fort Pierce, Saint Lucie County, Florida, United States                                                                                 | ▼ | <br> |
| 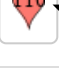 | Fort Pierre, Stanley County, South Dakota, 57532, United States                                                                         |   | <br> |
| 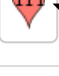 | Fountain Inn, Greenville County, South Carolina, 29644, United States                                                                   |   | <br> |
| 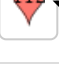 | Fremont County, Wyoming, United States                                                                                                  | ▼ | <br> |
| 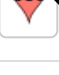 | Frenchville, Aroostook County, Maine, 04745, United States                                                                              | ▼ | <br> |

|                                                                                     |                                                                                 |                                                                                                                                                                                |
|-------------------------------------------------------------------------------------|---------------------------------------------------------------------------------|--------------------------------------------------------------------------------------------------------------------------------------------------------------------------------|
| 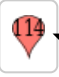    | Gang Mills, Town of Erwin, Steuben County, New York, 14870, United States       | <br>     |
| 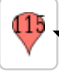   | Gatesville, Coryell County, Texas, 76599, United States                         | <br>     |
| 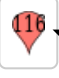   | Gathright Dam, Alleghany County, Virginia, United States                        | <br>     |
| 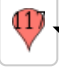   | Georgetown, Sussex County, Delaware, 19947, United States                       | <br>     |
| 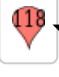   | Grand Forks, Grand Forks County, North Dakota, United States                    | <br>     |
| 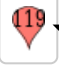   | Grant City, Worth County, Missouri, 64456, United States                        | <br>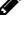     |
| 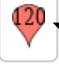   | Gray, Cumberland County, Maine, 04039, United States                            | <br>     |
| 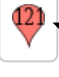   | Greenland, Greenland Township, Ontonagon County, Michigan, 49929, United States | <br>     |
| 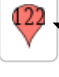 | Greenville, Hillsborough County, New Hampshire, United States                   | <br> |
| 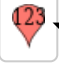 | Guthrie, Logan County, Oklahoma, 73044, United States                           | <br> |
| 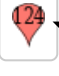 | Hancock County, Mississippi, United States                                      | <br> |
| 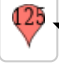 | Hannibal, Marion County, Missouri, 63401, United States                         | <br> |
| 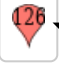 | Happy Jack, Coconino County, Arizona, United States                             | <br> |
| 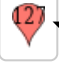 | Hawks Nest, Fayette County, West Virginia, 25812, United States                 | <br> |
| 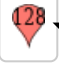 | Higginsville, Lafayette County, Missouri, 64037, United States                  | <br> |
| 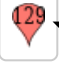 | Highland Home, Crenshaw County, Alabama, 36041, United States                   | <br> |
| 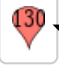 | Hightstown, Mercer County, New Jersey, United States                            | 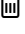<br>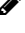 |

|                                                                                     |                                                                                                                                        |                                                                                                                                                                                |
|-------------------------------------------------------------------------------------|----------------------------------------------------------------------------------------------------------------------------------------|--------------------------------------------------------------------------------------------------------------------------------------------------------------------------------|
| 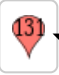    | Hoquiam, Grays Harbor County, Washington, 98550, United States                                                                         | <br>     |
| 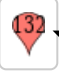   | Huntington, Cabell County, West Virginia, United States                                                                                | <br>     |
| 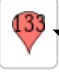   | International Falls, Koochiching County, Minnesota, 56679, United States                                                               | <br>     |
| 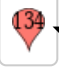   | Jackman, Somerset County, Maine, 04945, United States                                                                                  | <br>     |
| 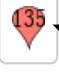   | Jamestown, Stutsman County, North Dakota, United States                                                                                | <br>     |
| 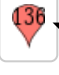   | Kingston, South County, Rhode Island, 02881, United States                                                                             | <br>     |
| 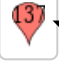   | Kingston, South County, Rhode Island, 02881, United States                                                                             | <br>     |
| 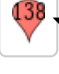   | Laketown, Rich County, Utah, 84038, United States                                                                                      | <br>     |
| 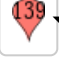 | Lava Point Road, Washington County, Utah, United States                                                                                | <br> |
| 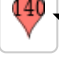 | Lawrence, Essex County, Massachusetts, United States                                                                                   | <br> |
| 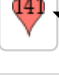 | Lead, Lawrence County, South Dakota, United States                                                                                     | <br> |
| 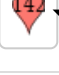 | Lebanon Municipal Airport, 5, Airpark Road, Lebanon, Grafton County, New Hampshire, 03784, United States                               | <br> |
| 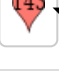 | Leverett, Franklin County, Massachusetts, 01054, United States                                                                         | <br> |
| 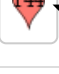 | Lima Allen County Airport, Bellefontaine Road, Rudolph Foods, Westminster, Auglaize Township, Allen County, Ohio, 45804, United States | <br> |
| 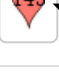 | Lincoln, Logan County, Illinois, 62656, United States                                                                                  | <br> |
| 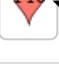 | Lisbon, Ransom County, North Dakota, United States                                                                                     | <br> |
| 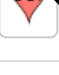 | Malden Municipal Airport, Bucknell Drive, Malden, Dunklin County, Missouri, 63863, United States                                       | <br> |

|                                                                                     |                                                                                                                        |                                                                                                                                                                                |
|-------------------------------------------------------------------------------------|------------------------------------------------------------------------------------------------------------------------|--------------------------------------------------------------------------------------------------------------------------------------------------------------------------------|
| 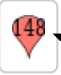    | Marietta, Muskogee, Muskogee County, Oklahoma, 74401, United States                                                    | <br>     |
| 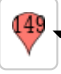   | McFarland Hill Cemetery, US Highway 1, Hancock, Hancock County, Maine, 04662, United St                                | <br>     |
| 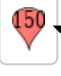   | Memphis International Airport, Shannon Circle, Memphis, Shelby County, West Tennessee, Tennessee, 38118, United States | <br>     |
| 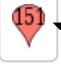   | Mission, Antelope Segment, Todd County, South Dakota, 57555, United States                                             | <br>     |
| 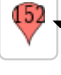   | Mitchell Municipal Airport, 5971, Hangar Road, Mitchell, Davison County, South Dakota, 57301, United States            | 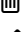<br>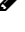     |
| 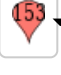   | Morrilton, Conway County, Arkansas, 72110, United States                                                               | 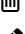<br>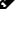     |
| 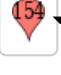   | Newport State Airport, Airport Access Road, Middletown, Newport County, Rhode Island, 02842, United States             | 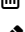<br>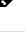     |
| 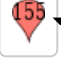   | Fort Ninigret, Charlestown, South County, Rhode Island, 02813, United States                                           | <br>     |
| 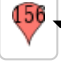 | Norfolk, Litchfield County, Connecticut, 06058, United States                                                          | 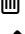<br> |
| 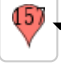 | North Springfield, Springfield, Windsor County, Vermont, 05150, United States                                          | <br> |
| 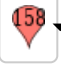 | Norwich, New London County, Connecticut, United States                                                                 | 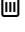<br> |
| 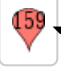 | Ocate, Mora County, New Mexico, United States                                                                          | <br>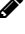 |
| 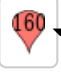 | Pleasant Grove, Utah County, Utah, 84062, United States                                                                | 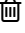<br> |
| 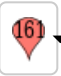 | Ponca City, Kay County, Oklahoma, United States                                                                        | 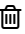<br>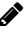 |
| 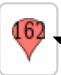 | Ridgway, Elk County, Pennsylvania, 15853, United States                                                                | 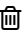<br>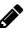 |
| 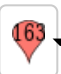 | Riverhead, Town of Riverhead, Suffolk County, New York, United States                                                  | <br> |
| 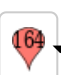 | Royal City, Grant County, Washington, 99357, United States                                                             | 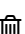<br>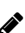 |

|                                                                                     |                                                                                                                       |   |                                                                                                                                                                                |
|-------------------------------------------------------------------------------------|-----------------------------------------------------------------------------------------------------------------------|---|--------------------------------------------------------------------------------------------------------------------------------------------------------------------------------|
| 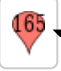   | Saluda, Saluda County, South Carolina, 29138, United States                                                           | ▼ | 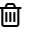<br>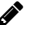     |
| 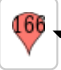   | Sanpete County, Utah, United States                                                                                   |   | 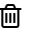<br>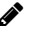     |
| 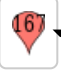   | Sevierville, Sevier County, Tennessee, United States                                                                  | ▼ | 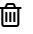<br>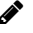     |
| 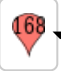   | Sherburne County, Minnesota, United States                                                                            |   | 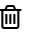<br>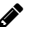     |
| 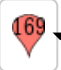   | South Jersey Regional Airport, Fenimore Road, Lumberton Township, Burlington County, New Jersey, 08036, United States |   | 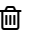<br>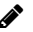     |
| 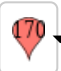   | Springfield, Windsor County, Vermont, United States                                                                   |   | 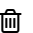<br>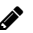     |
| 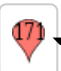   | Stamford, Fairfield County, Connecticut, United States                                                                | ▼ | 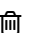<br>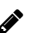     |
| 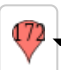   | Tazewell, Claiborne County, Tennessee, United States                                                                  |   | 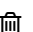<br>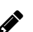     |
| 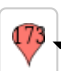  | Trinity Park, Historic South-Central, Los Angeles, Los Angeles County, CAL Fire Southern Re                           | ▼ | 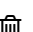<br>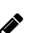  |
| 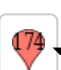 | Trout Creek, Busch, Gallatin County, Montana, United States                                                           | ▼ | 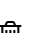<br>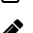 |
| 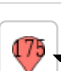 | Troy, Pike County, Alabama, United States                                                                             | ▼ | 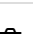<br>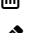 |
| 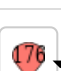 | Tully Lake, Royalston, Worcester County, Massachusetts, United States                                                 | ▼ | 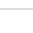<br>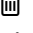 |
| 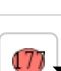 | Tulsa, Tulsa County, Oklahoma, United States                                                                          | ▼ | 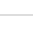<br>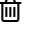 |
| 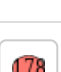 | Vicksburg City Cemetery, Vicksburg, Warren County, Mississippi, United States                                         | ▼ | 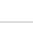<br>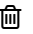 |
| 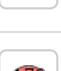 | Waldron, Scott County, Arkansas, 72958, United States                                                                 | ▼ | 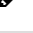<br>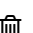 |
| 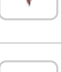 | Warner Robins, Houston County, Georgia, United States                                                                 | ▼ | 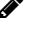<br>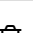 |
| 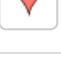 | Washington, District of Columbia, United States                                                                       | ▼ | 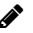<br>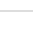 |

|                                      |                                                                                                                                   |                                   |
|--------------------------------------|-----------------------------------------------------------------------------------------------------------------------------------|-----------------------------------|
| <div><div>182</div><div></div></div> | <div>Ronald Reagan Washington National Airport, 2401, Smith Boulevard, Crystal City, Arlington, /</div> <div></div>               | <div><div></div><div></div></div> |
| <div><div>183</div><div></div></div> | <div>Wausau Street, Tucker Place, Aberdeen, Monroe County, Mississippi, 39730, United States</div> <div></div>                    | <div><div></div><div></div></div> |
| <div><div>184</div><div></div></div> | <div>White Mountain National Forest, New Hampshire, United States</div> <div></div>                                               | <div><div></div><div></div></div> |
| <div><div>185</div><div></div></div> | <div>Wilmington, New Castle County, Delaware, United States</div> <div></div>                                                     | <div><div></div><div></div></div> |
| <div><div>186</div><div></div></div> | <div>Wolfsburg, Bedford Township, Bedford County, Pennsylvania, 15522, United States</div> <div></div>                            | <div><div></div><div></div></div> |
| <div><div>187</div><div></div></div> | <div>Wooster, Wayne County, Ohio, 44691, United States</div> <div></div>                                                          | <div><div></div><div></div></div> |
| <div><div>188</div><div></div></div> | <div>Youngstown–Warren Regional Airport, King-Graves Road, Tyrrell, Trumbull County, Ohio, 44473, United States</div> <div></div> | <div><div></div><div></div></div> |
| <div><div>189</div><div></div></div> | <div>Village of Youngstown, Town of Porter, Niagara County, New York, United States</div> <div></div>                             | <div><div></div><div></div></div> |
